# Supplementary material for: Common and Key Differential Pathogenic Pathways in Desminopathy and Titinopathy
Source: PubMed Central journal article supplement (PMC11373559; doi:10.7150/ijms.97797), 2024-08-01

## **Supplementary materials**

Supplementary Figure 1 Bubble plots of GO and KEGG analysis results.

Supplementary Figure 2 Expression levels of hub genes in the three groups

Supplementary Table 1 Demographics of MFM patients

Supplementary Table 2 Identified protein

Supplementary Table 3 Proteins used for subsequent analysis

Supplementary Table 4 Putative DAPs in desminopathy compared with titinopathy

Supplementary Table 5 Putative DAPs in desminopathy compared with controls

Supplementary Table 6 Putative DAPs in titinopathy compared with controls

Supplementary Table 7 Most dysregulated pathways by GSEA

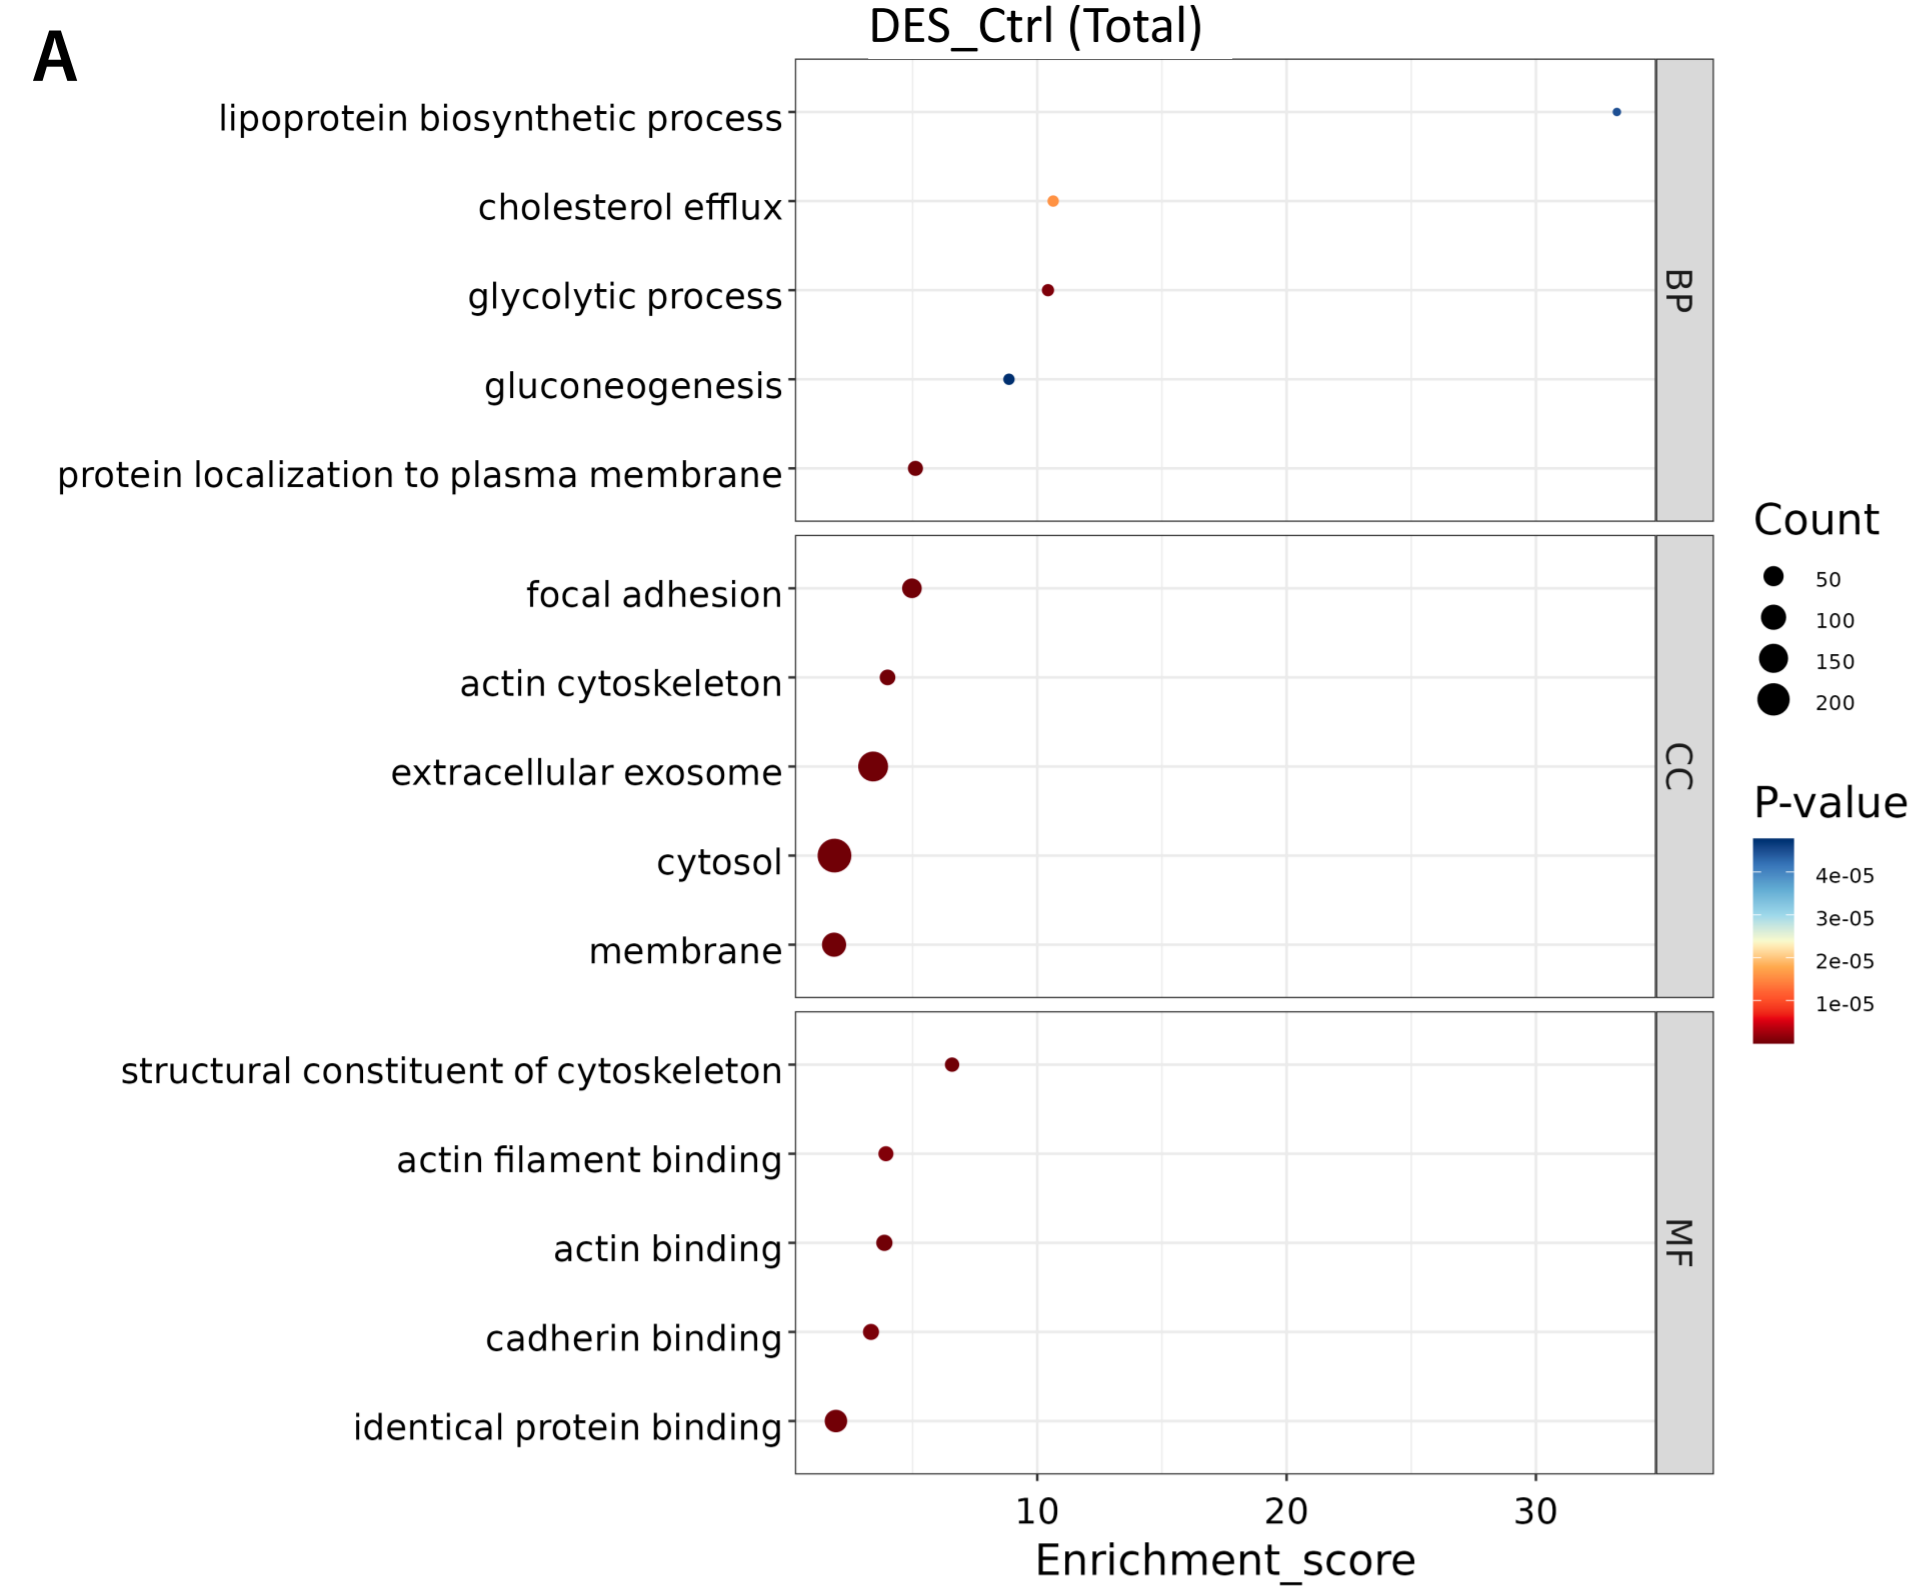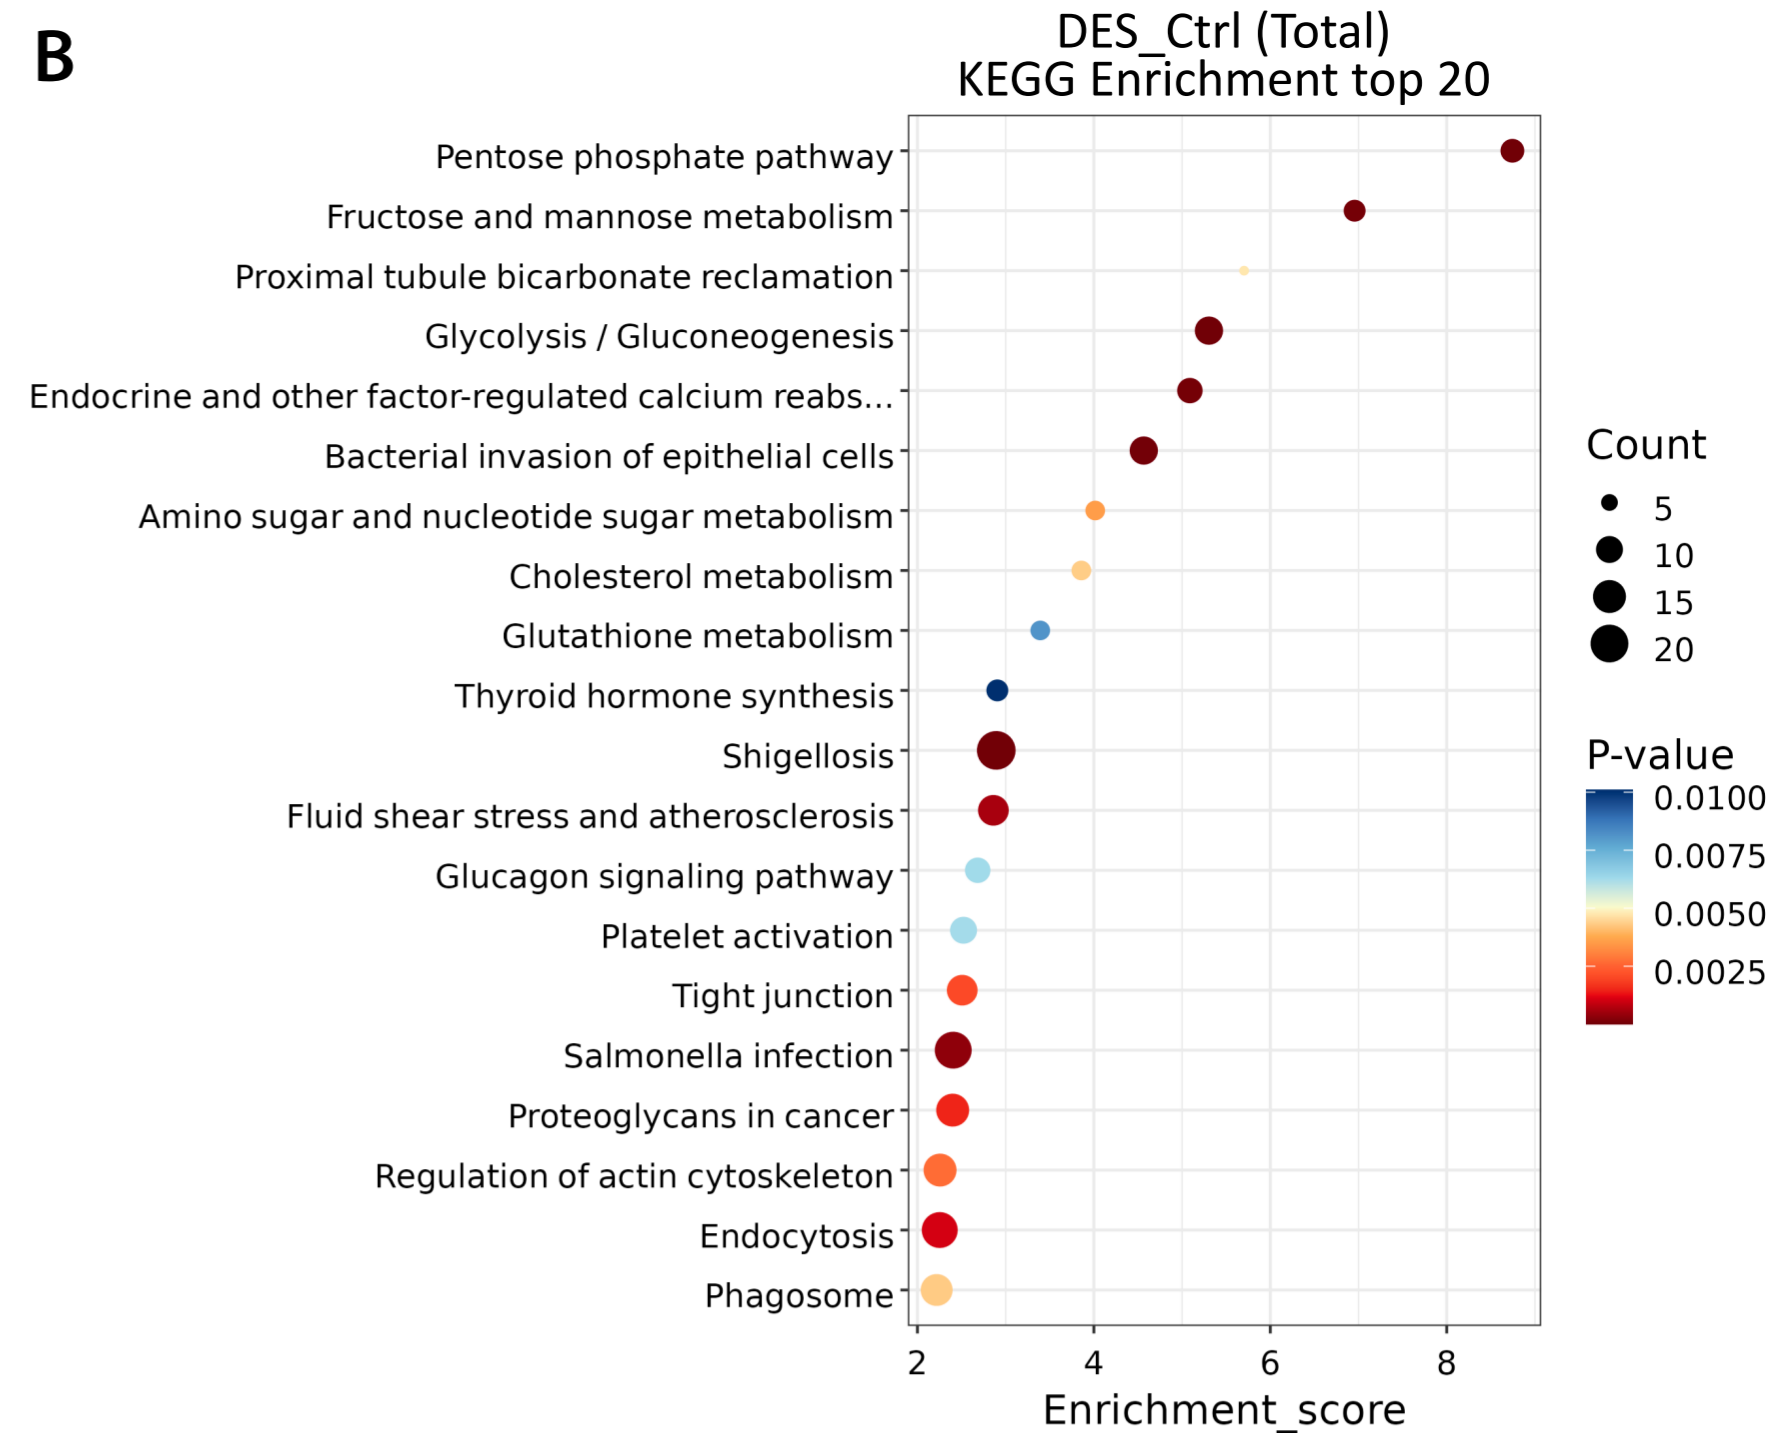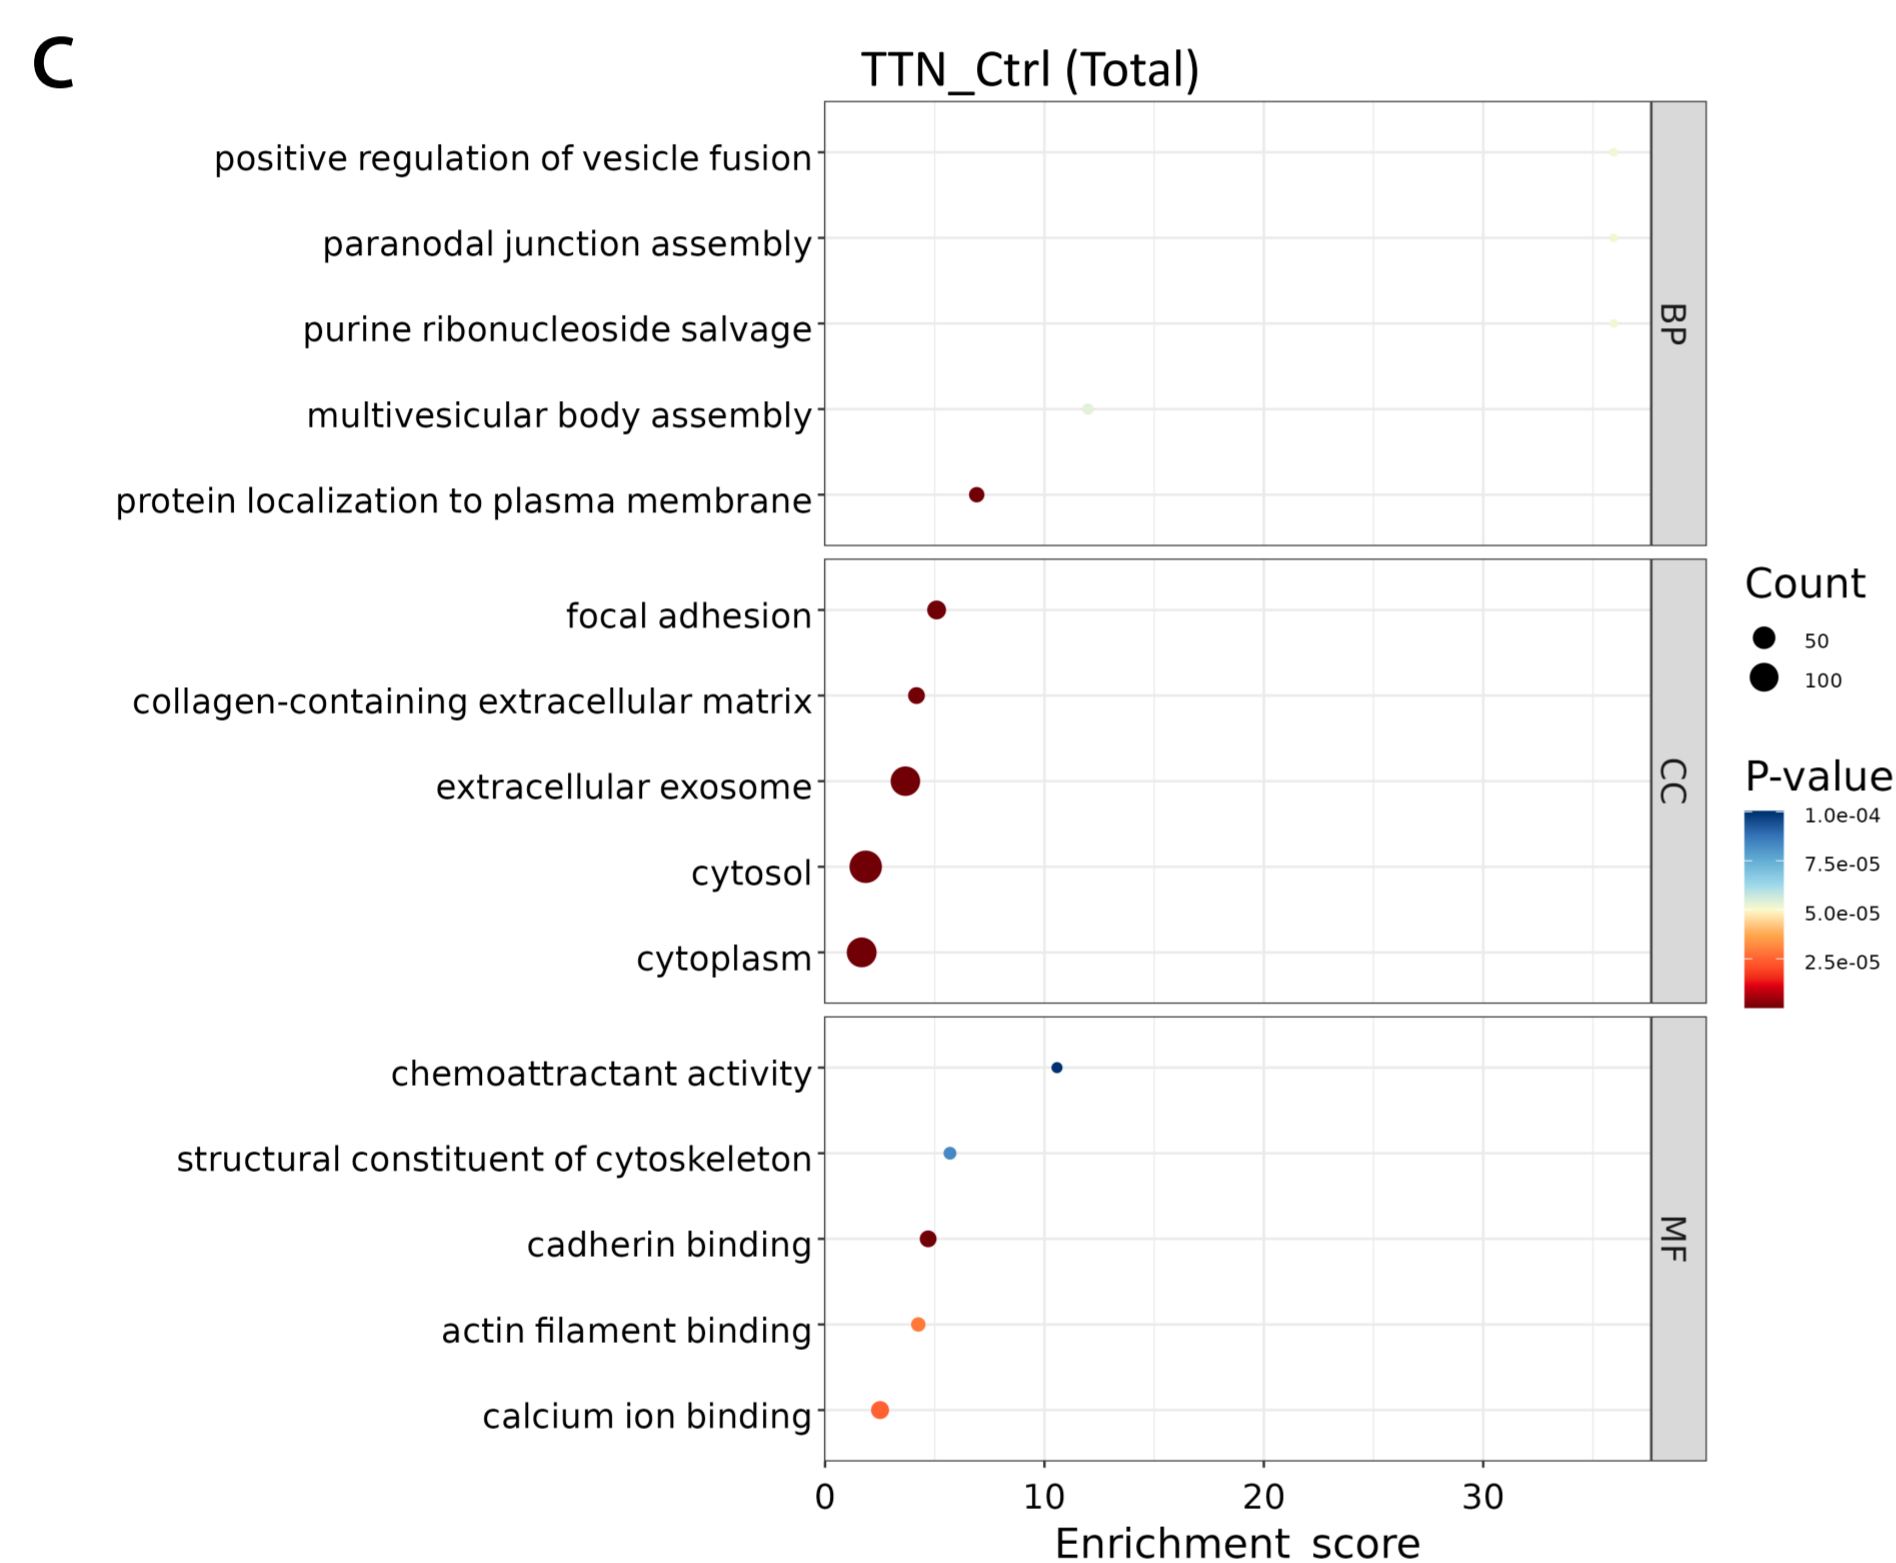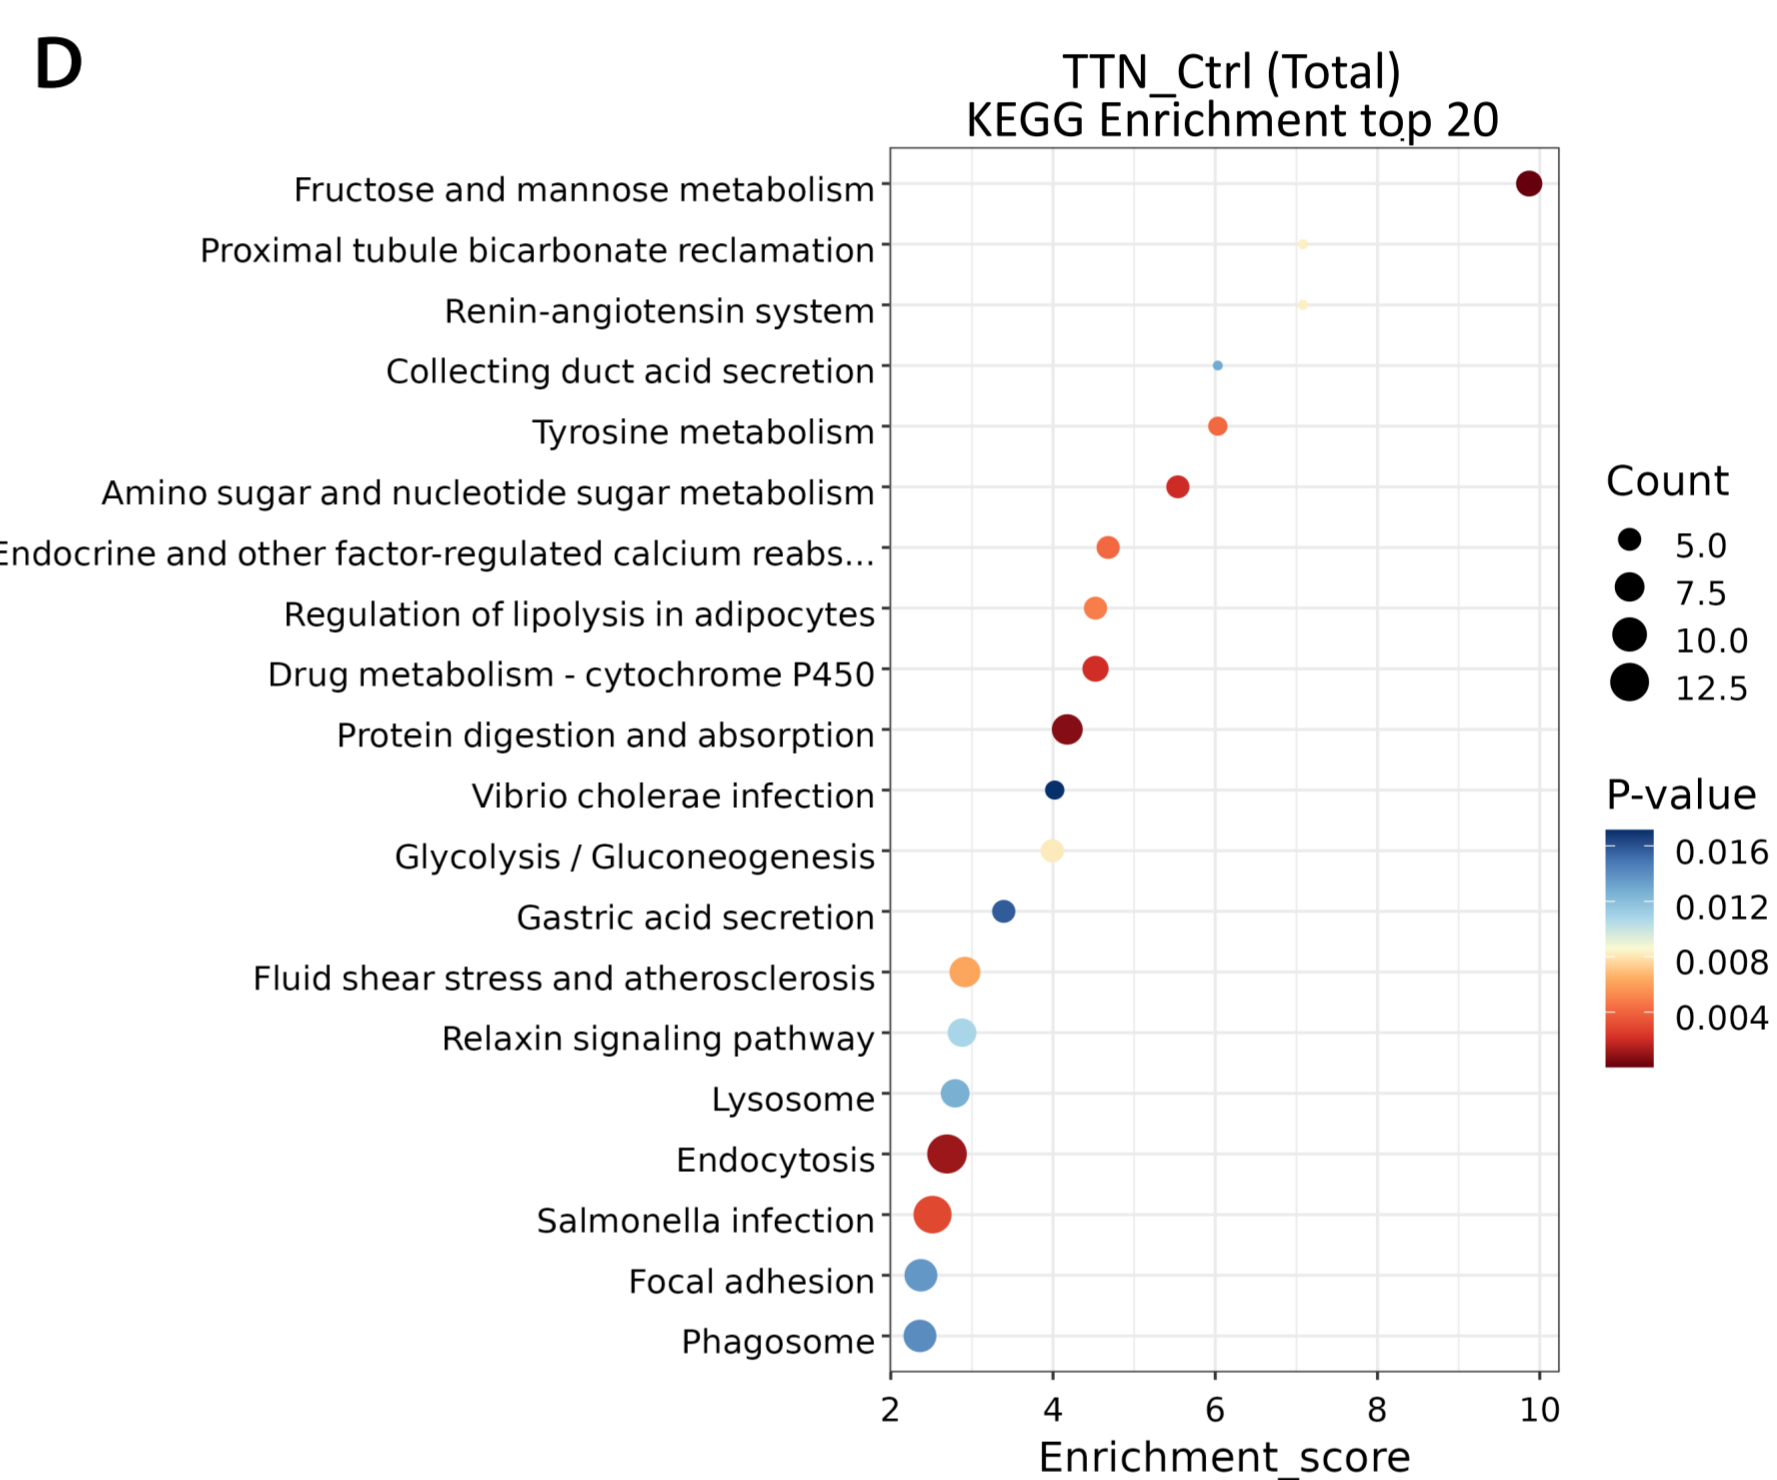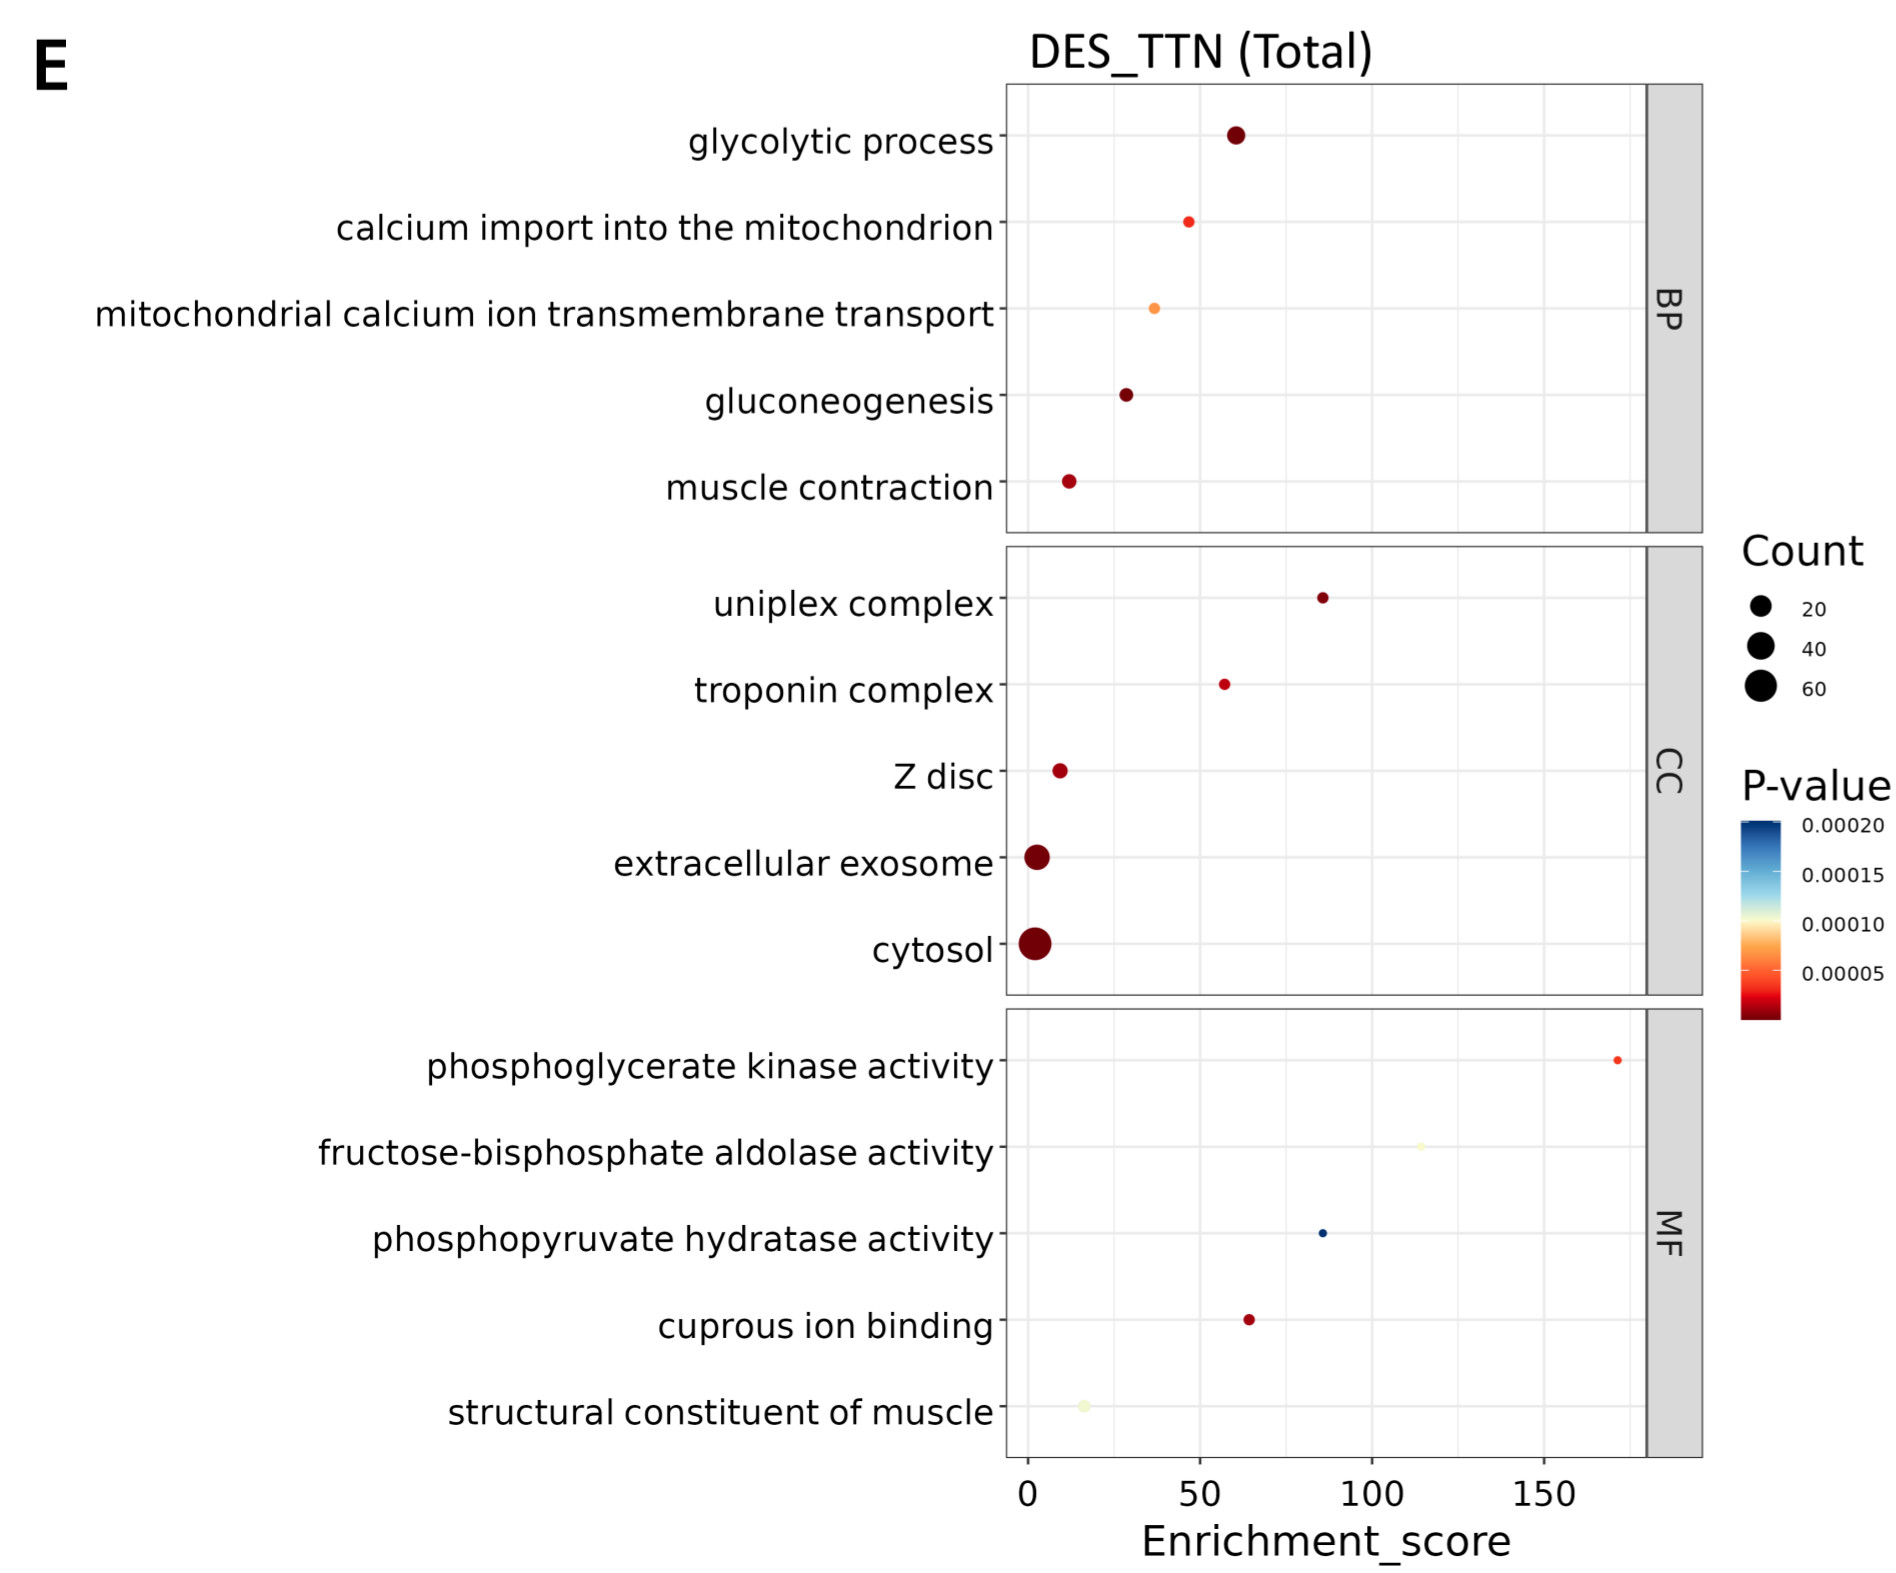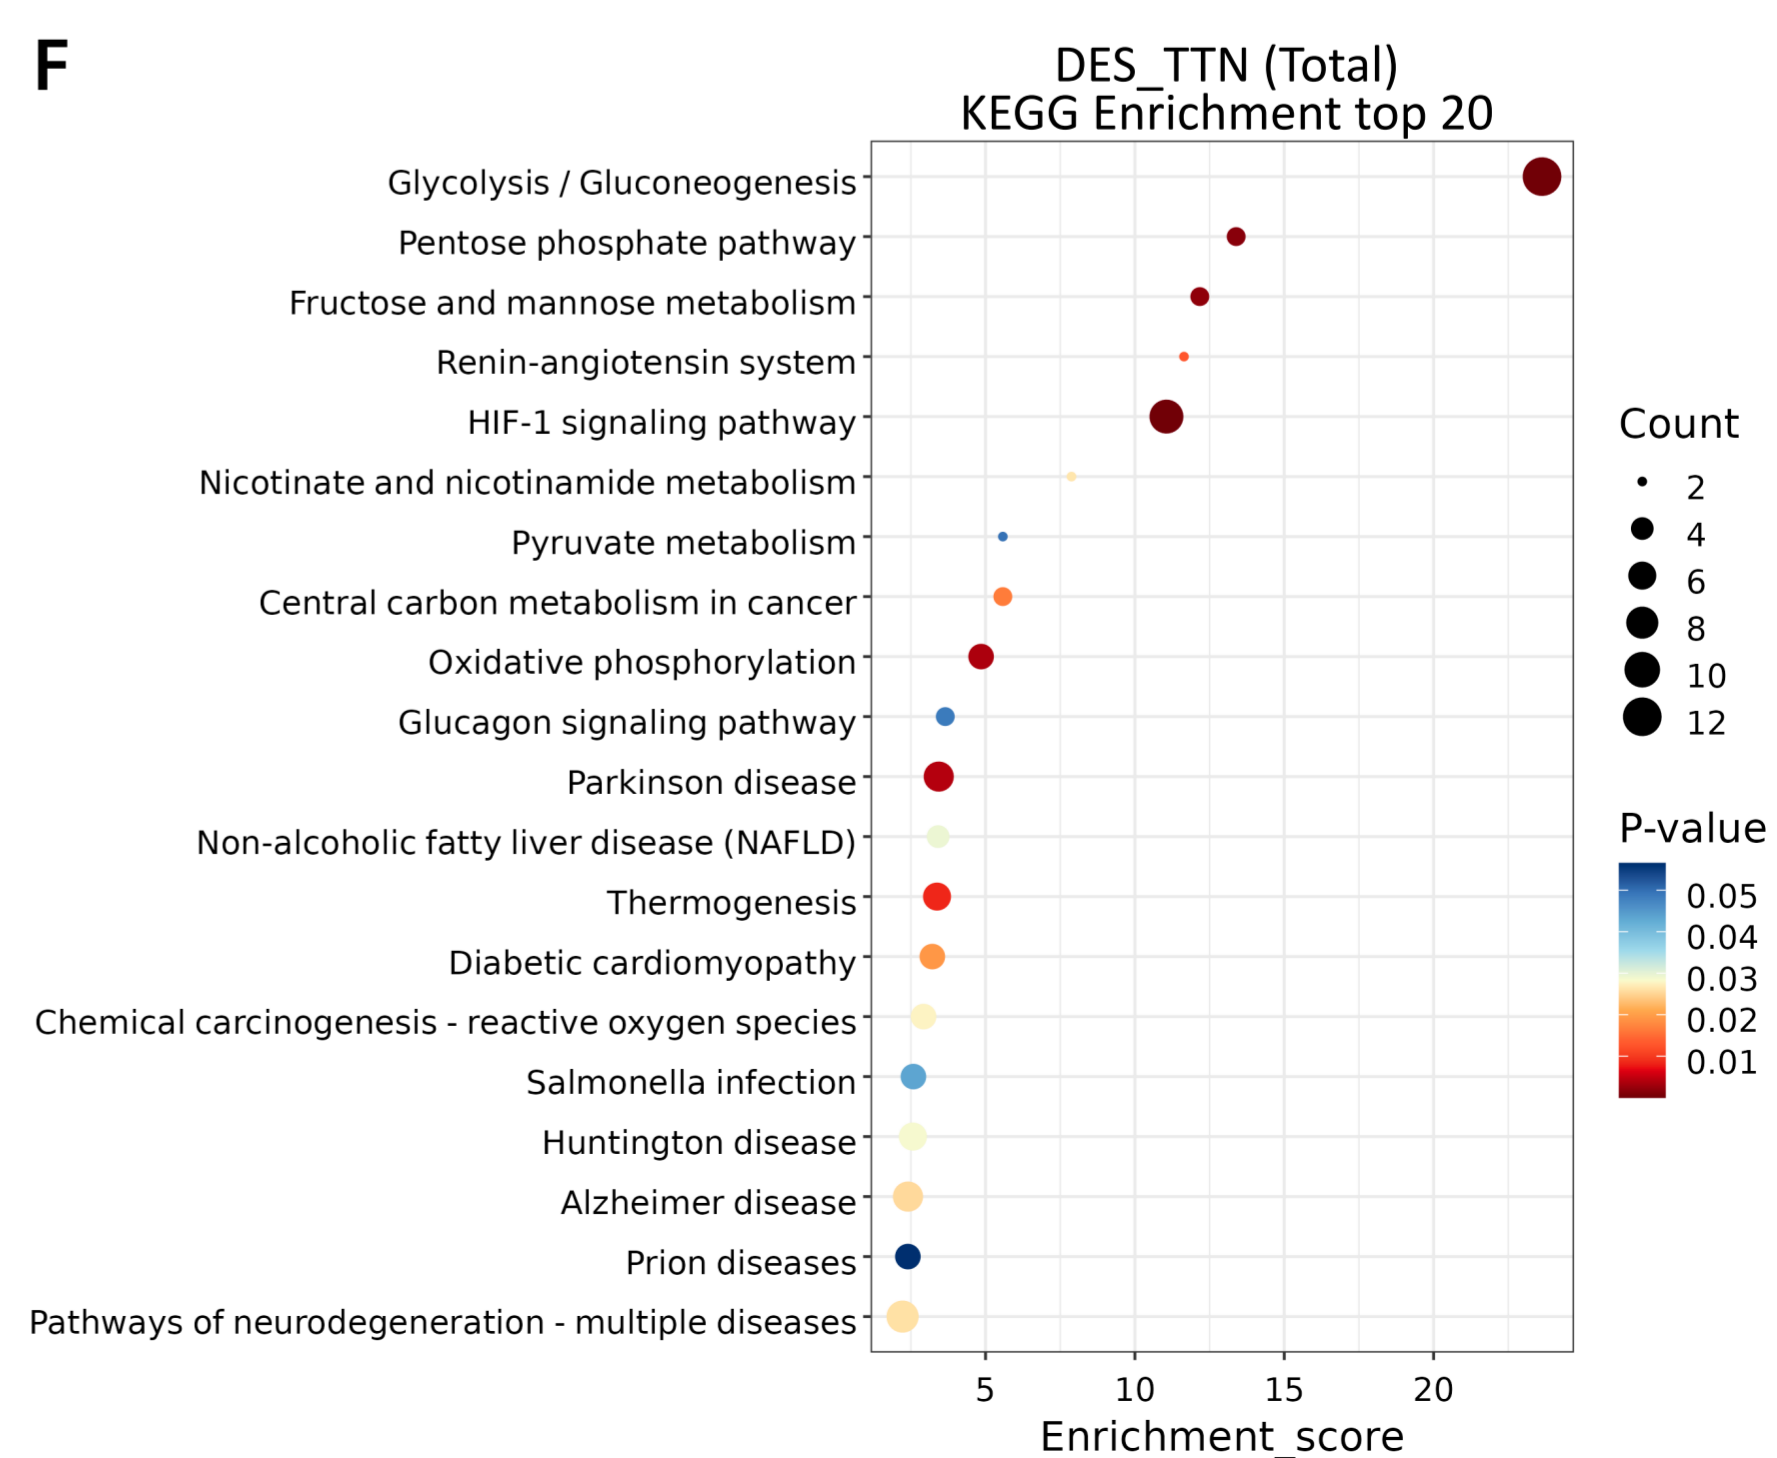

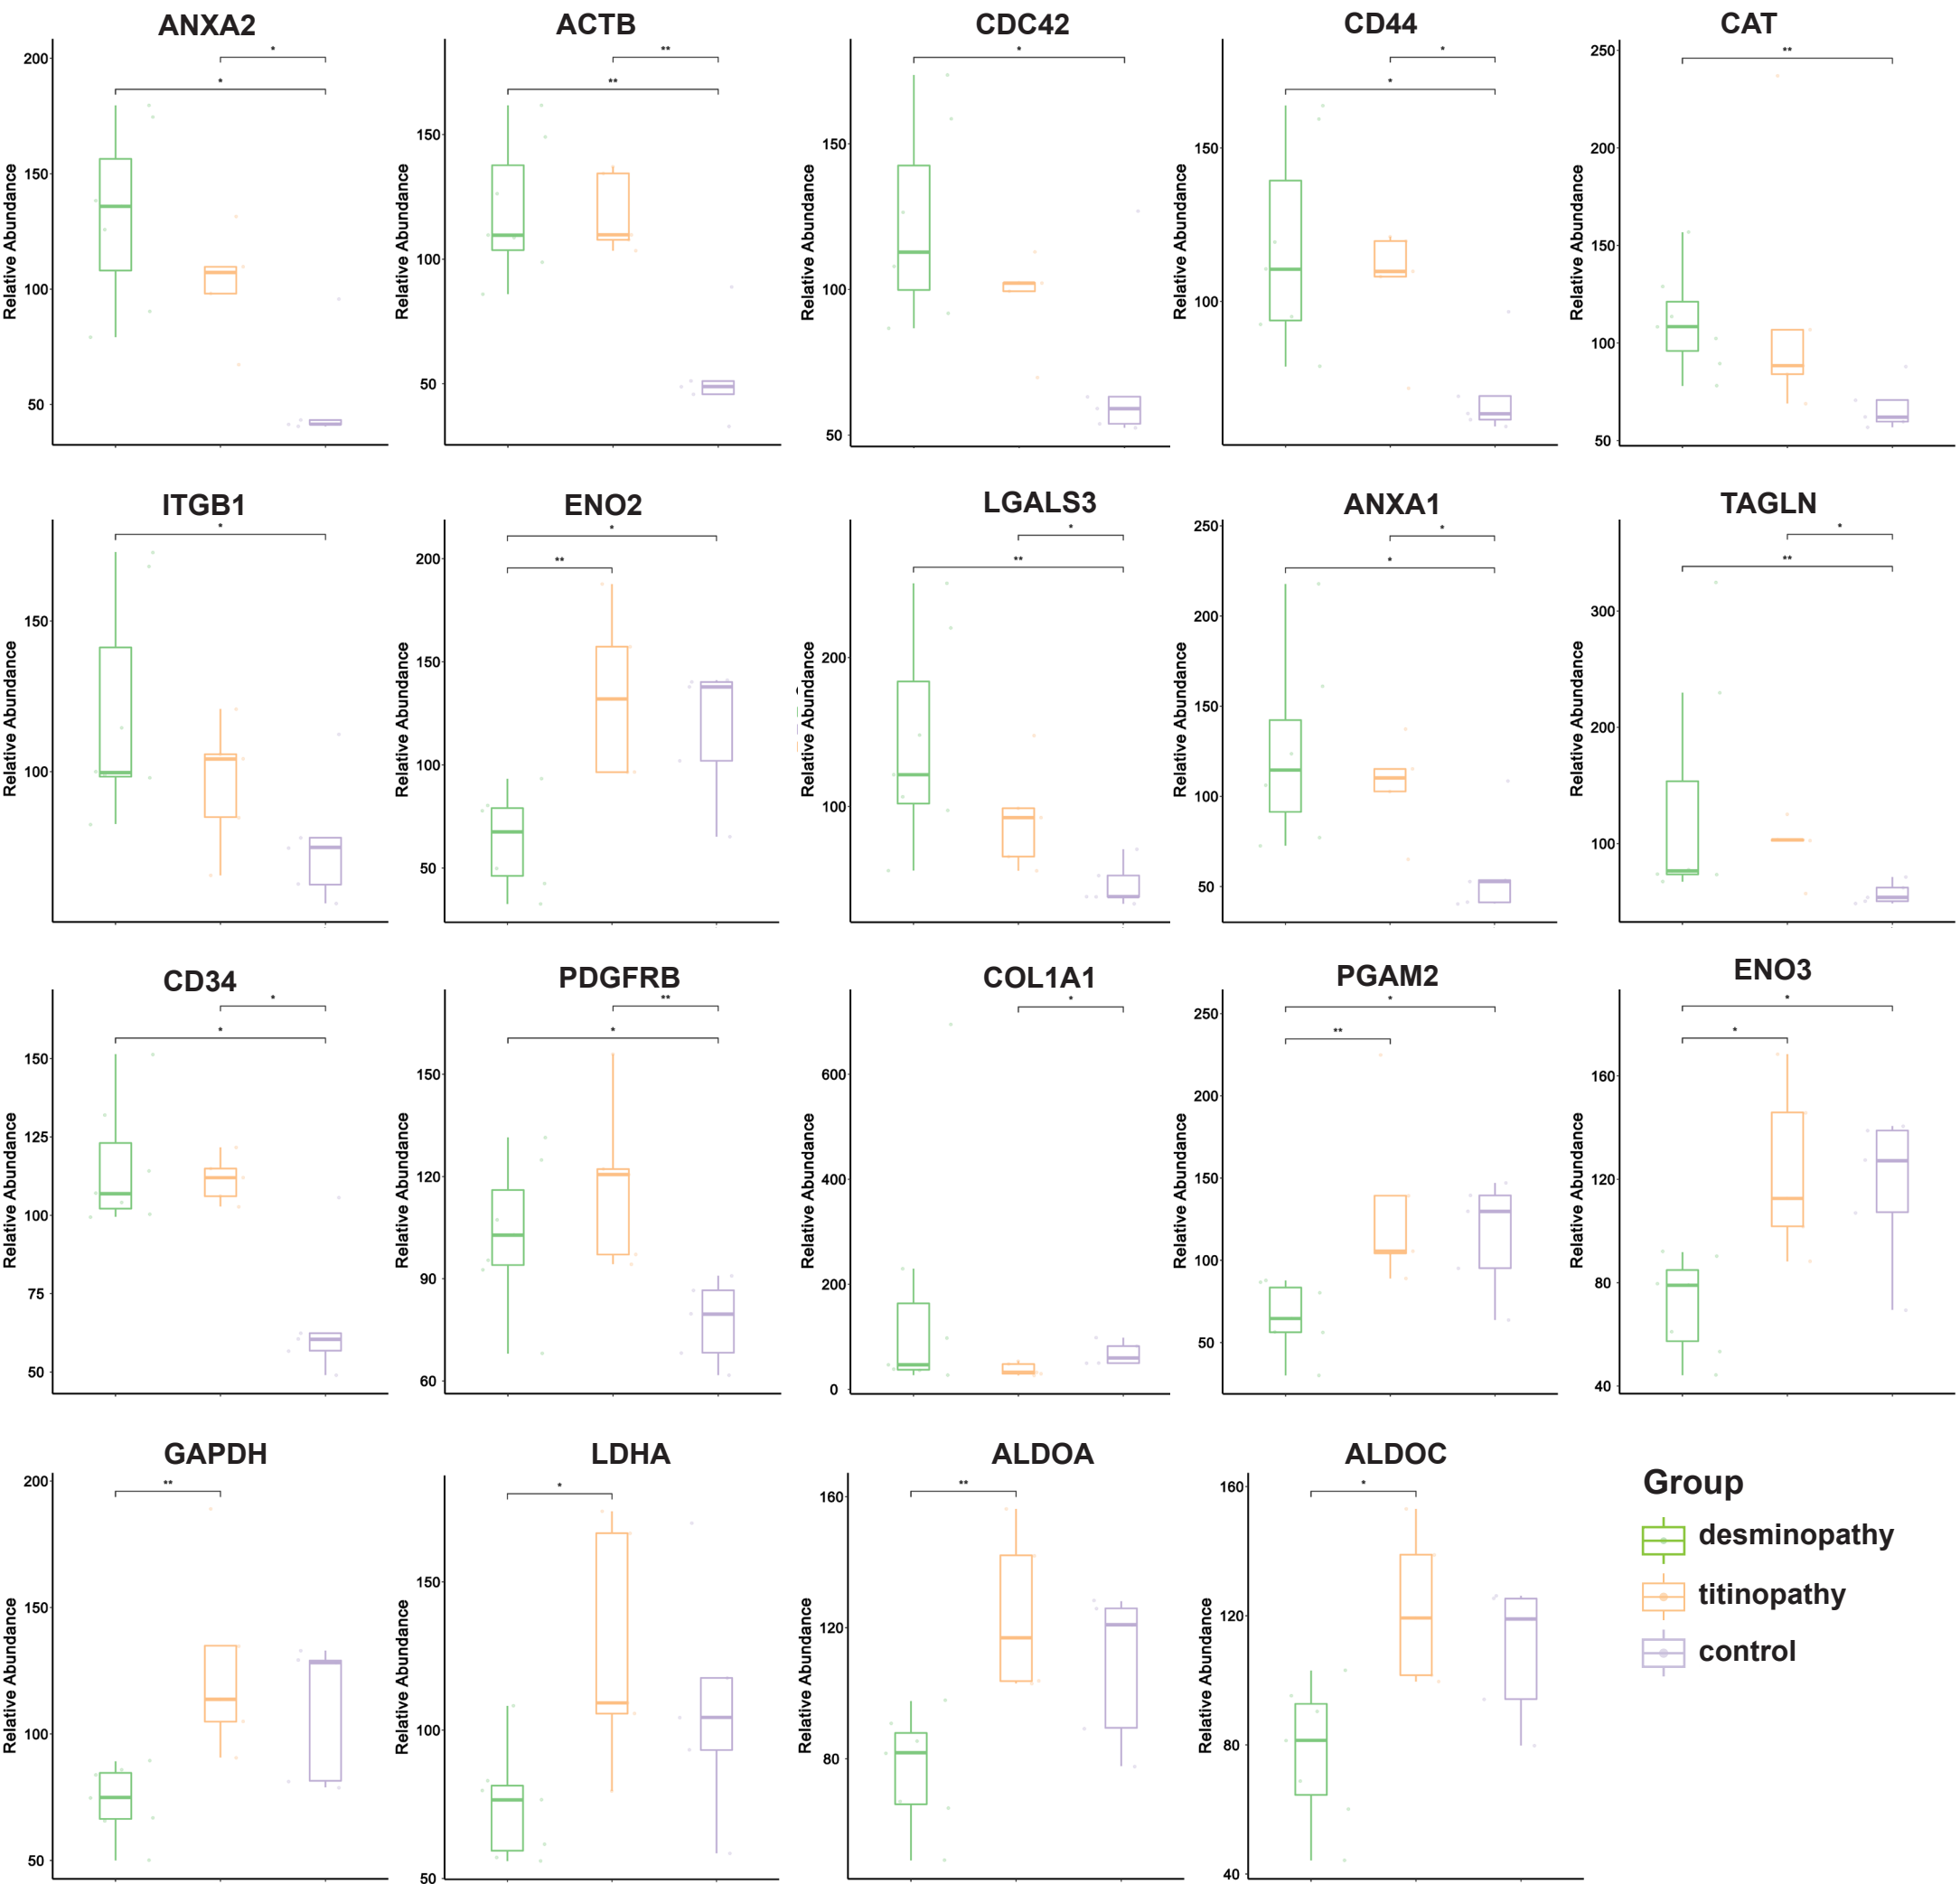

Supplement: ijmsv21p2040s1.pdf [file ijmsv21p2040s1.pdf]
